# Supplementary material for: NOX5-L can stimulate proliferation and apoptosis depending on its levels and cellular context, determining cancer cell susceptibility to cisplatin
Source: PubMed Central journal article supplement (PMC4770769; doi:10.18632/oncotarget.5743), 2015-10-15
Supplement: oncotarget-06-39235-s001.pdf [file oncotarget-06-39235-s001.pdf]

## SUPPLEMENTARY FIGURES AND TABLES

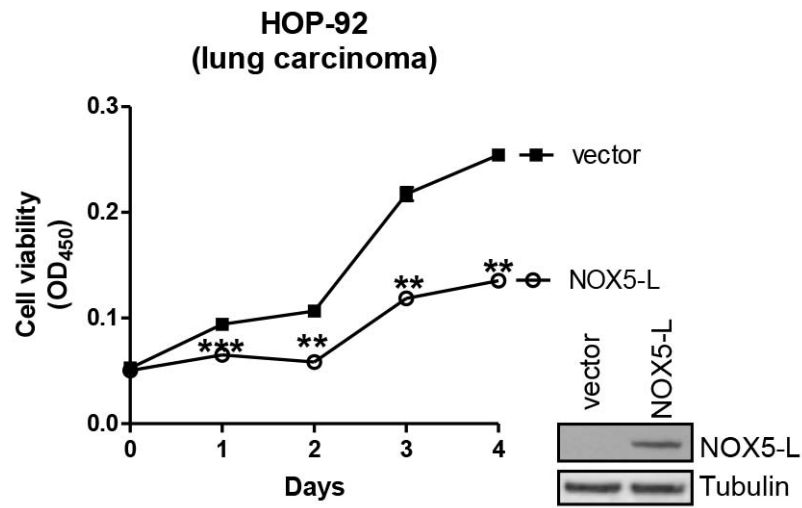

**Supplementary Figure S1: NOX5-L expression causes cell death in HOP-92 cells.** Cell viability assays of HOP-92 cells expressing control vector or NOX5-L. *Insets:* Expression of NOX5-L was confirmed by immunoblotting ( $n = 3$ ; \*\* $P < 0.01$ , \*\*\* $P < 0.001$  vs. vector; Student's t test).

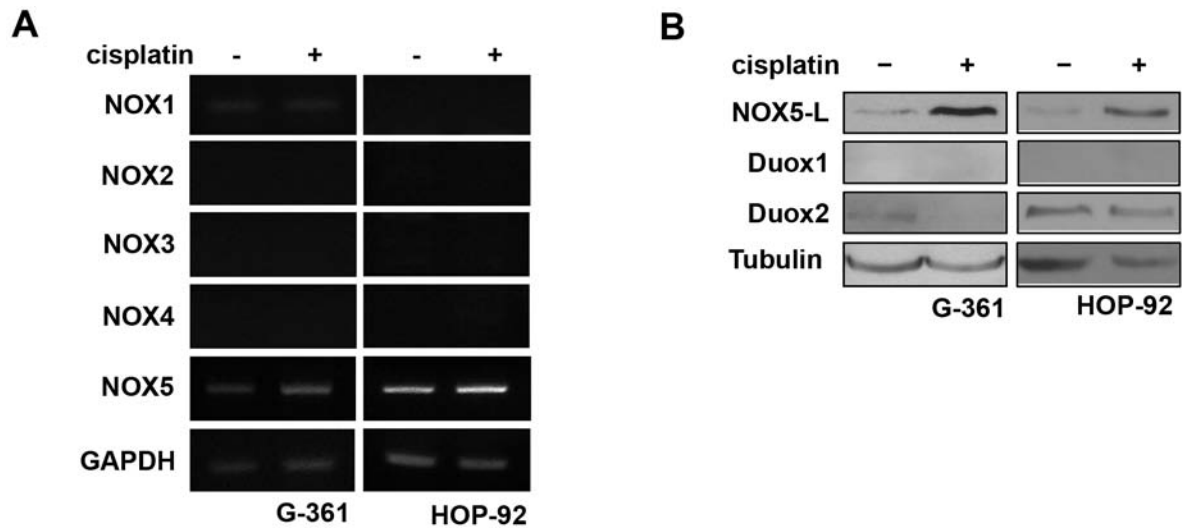

**Supplementary Figure S2: Cisplatin triggers the production of high ROS levels through NOX5-L upregulation.** mRNA **A.** and protein **B.** expression of NOX family members in G-361 and HOP-92 cells. Cells were treated with cisplatin for 24 h. GAPDH and tubulin were used as loading controls.

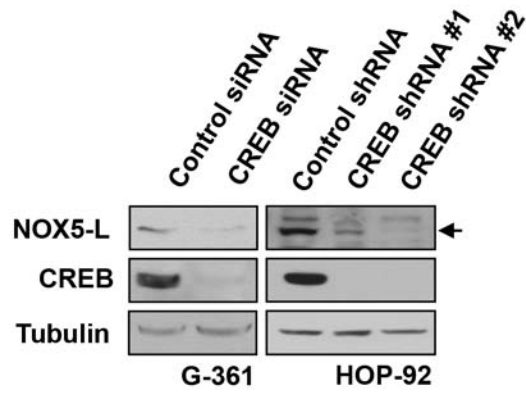

**Supplementary Figure S3: CREB knockdown downregulates NOX5-L in cancer cells.** Immunoblots of NOX5-L, CREB, and tubulin from G-361 and HOP-92 cells expressing control, CREB siRNA or CREB shRNA. Arrow indicates NOX5-L.

**Supplementary Table S1: Quantitative RT-PCR primer sequences**

| Target      | Forward (5'-3')           | Reverse (5'-3')          |
|-------------|---------------------------|--------------------------|
| Human NOX1  | GGAGCAGGAATTGGGGTCAC      | TTGCTGTCCCATCCGGTGAG     |
| Human NOX2  | GGAGTTTCAAGATGCGTGGAAACTA | GCCAGACTCAGAGTTGGAGATGCT |
| Human NOX3  | GGATCGGAGTCACTCCCTTCGCTG  | ATGAACACCTCTGGGGTCAGCTGA |
| Human NOX4  | GGAGTTTCAAGATGCGTGGAAACTA | GCCAGACTCAGAGTTGGAGATGCT |
| Human NOX5  | CTATTGGACTCACCTGTCCTACC   | GGAAAAACAAGATTCCAGGCAC   |
| Human GAPDH | TGTTGCCATCAATGACCCCTT     | CTCCACGACGTACTCAGCG      |

**Supplementary Table S2: RT-PCR primer sequences**

| Target      | Forward (5'-3')         | Reverse (5'-3')         |
|-------------|-------------------------|-------------------------|
| Human NOX1  | GCACACCTGTTTAACTTTGACTG | GGACTGGATGGGATTTAGCCA   |
| Human NOX2  | CATCACCAAGGTGGTCACTC    | TCAACCGCTATCTTAGGTAGTTT |
| Human NOX3  | ACTGCCCTGACAGATGTATT    | CTGCTTGAACCTCATTGTTCC   |
| Human NOX4  | GACTGGACAGAACGATTTCG    | CTTGCCAAAACCTTGTTATGCA  |
| Human NOX5  | TCATCTCCTCATCAAGCGGC    | ATGAGCACGGCATGCTCAGA    |
| Human GAPDH | TGTTGCCATCAATGACCCCTT   | CTCCACGACGTACTCAGCG     |
